# Supplementary material
Source: bioRxiv or medRxiv preprint supplement (https://www.biorxiv.org/highwire/filestream/67373/field_highwire_adjunct_files/0/221085-1.pdf)
Supplement: Supplementary file [file 221085-1.pdf]

**A**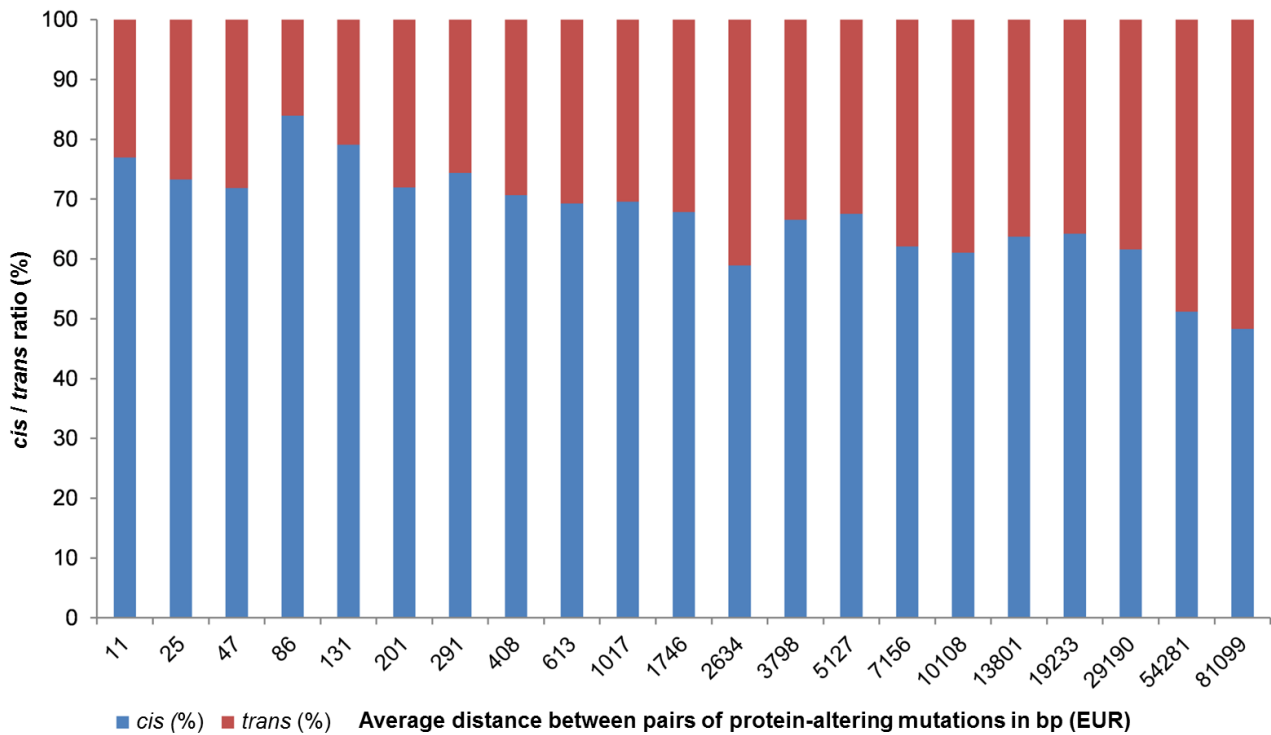**B**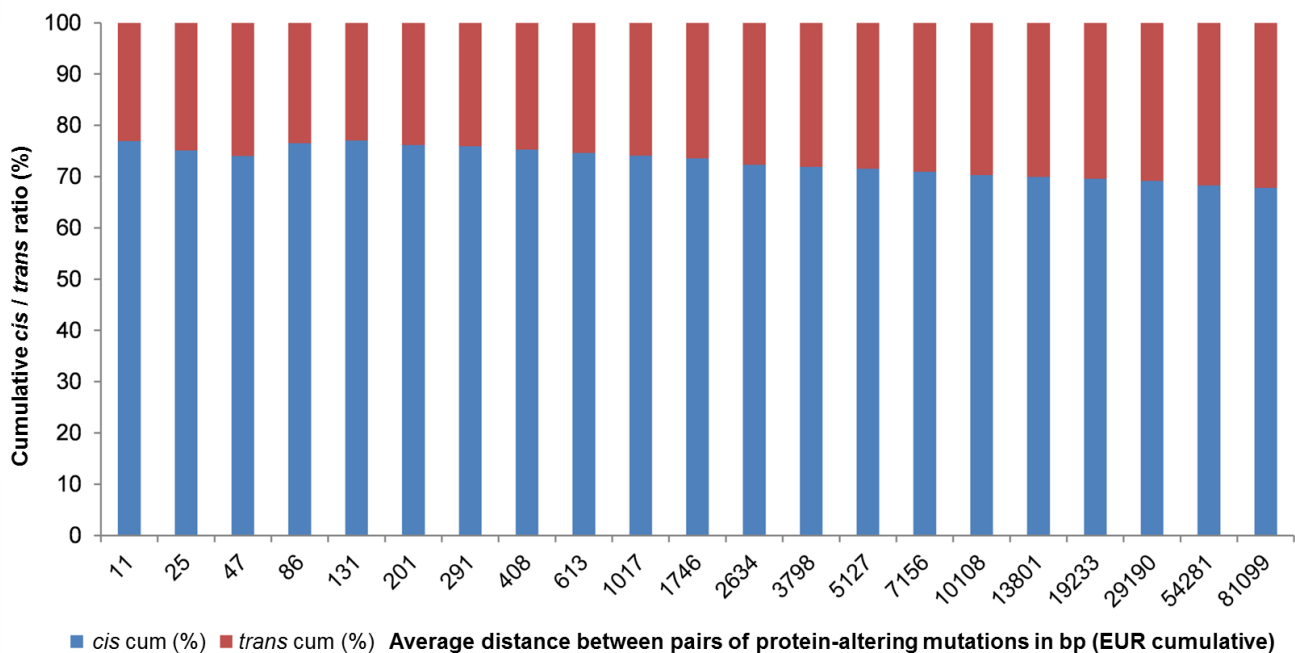**Figure S1. Relationship of inter-mutation distance with *cis/trans* ratio**

(A) Relationship of inter-mutation distance with *cis/trans* ratio in EUR. X-axis: Average distance between pairs of protein-altering mutations per bin; the different pairs of mutations were sorted by distance (bp), i.e. the difference between the genomic coordinates of each mutation, then distributed into approximately 20 bins; for each bin, the average mutation distance was calculated; y-axis: *cis/trans* ratios, with the relative fraction of *cis* configurations (%) in blue, and the relative fraction of *trans* configurations (%) in red, both fractions are complementary, in sum 100%.

(B) Cumulative *cis/trans* ratios.

**C**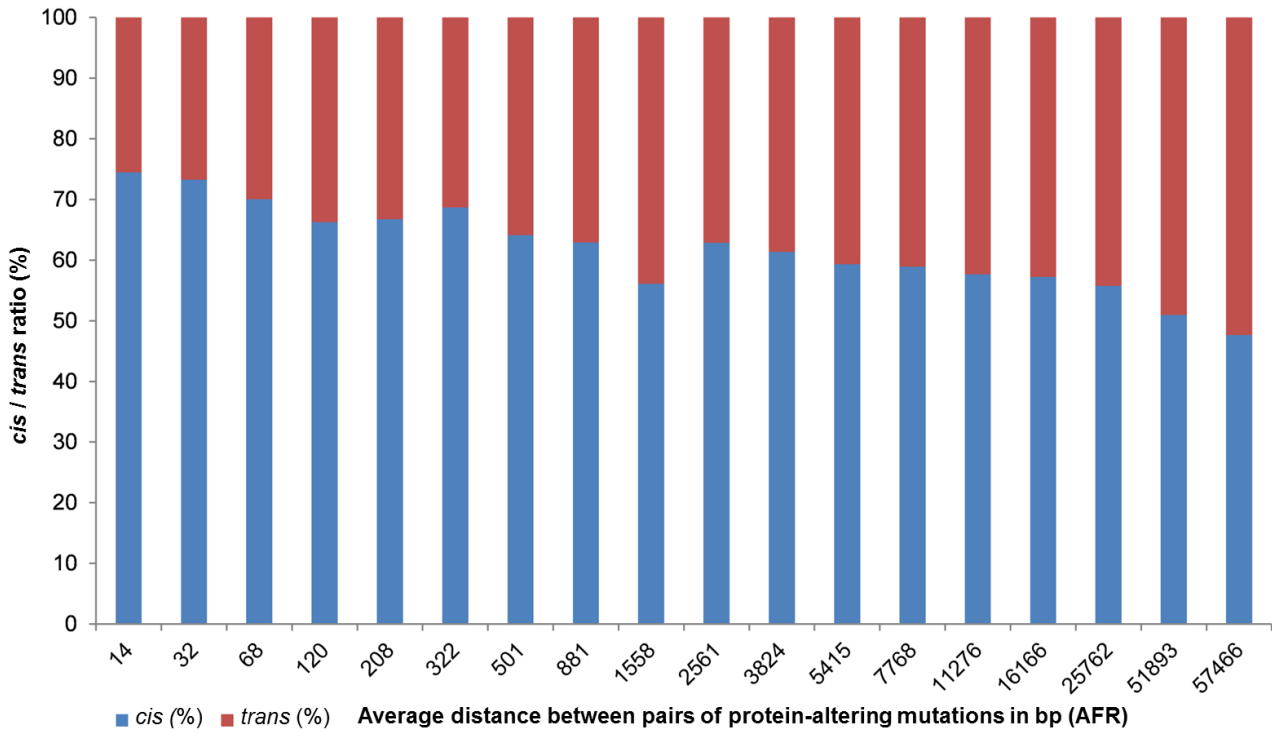**D**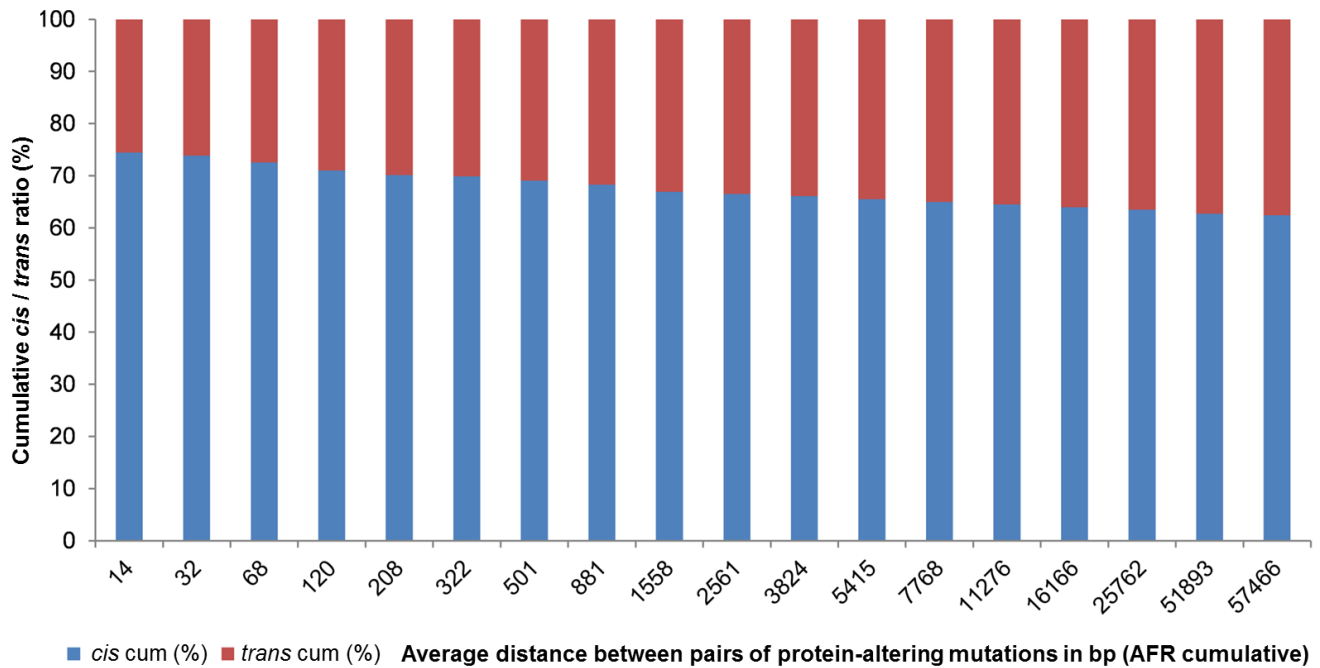**Figure S1. Relationship of inter-mutation distance with *cis/trans* ratio***(C)* Relationship of inter-mutation distance with *cis/trans* ratio in AFR, analogous to *(A)*.*(D)* Cumulative *cis/trans* ratios, analogous to *(B)*.

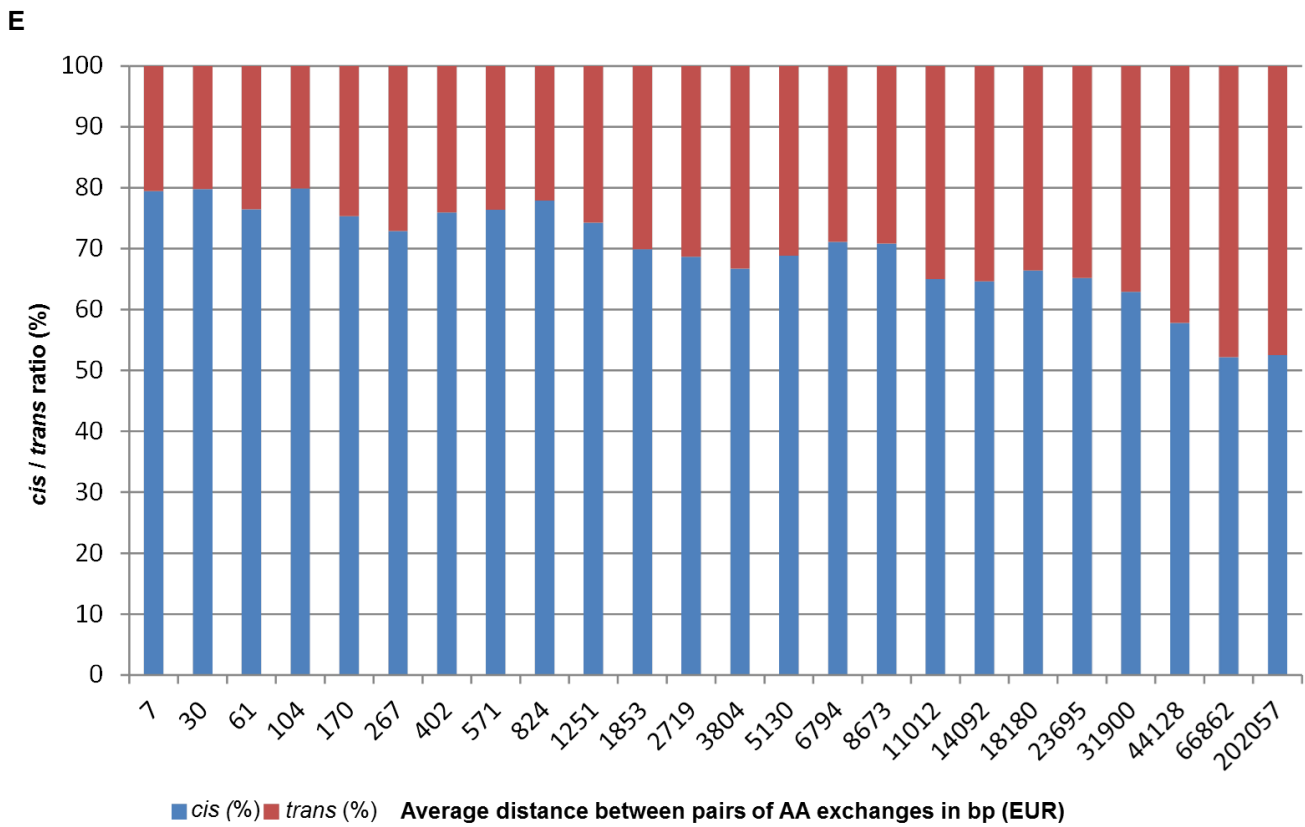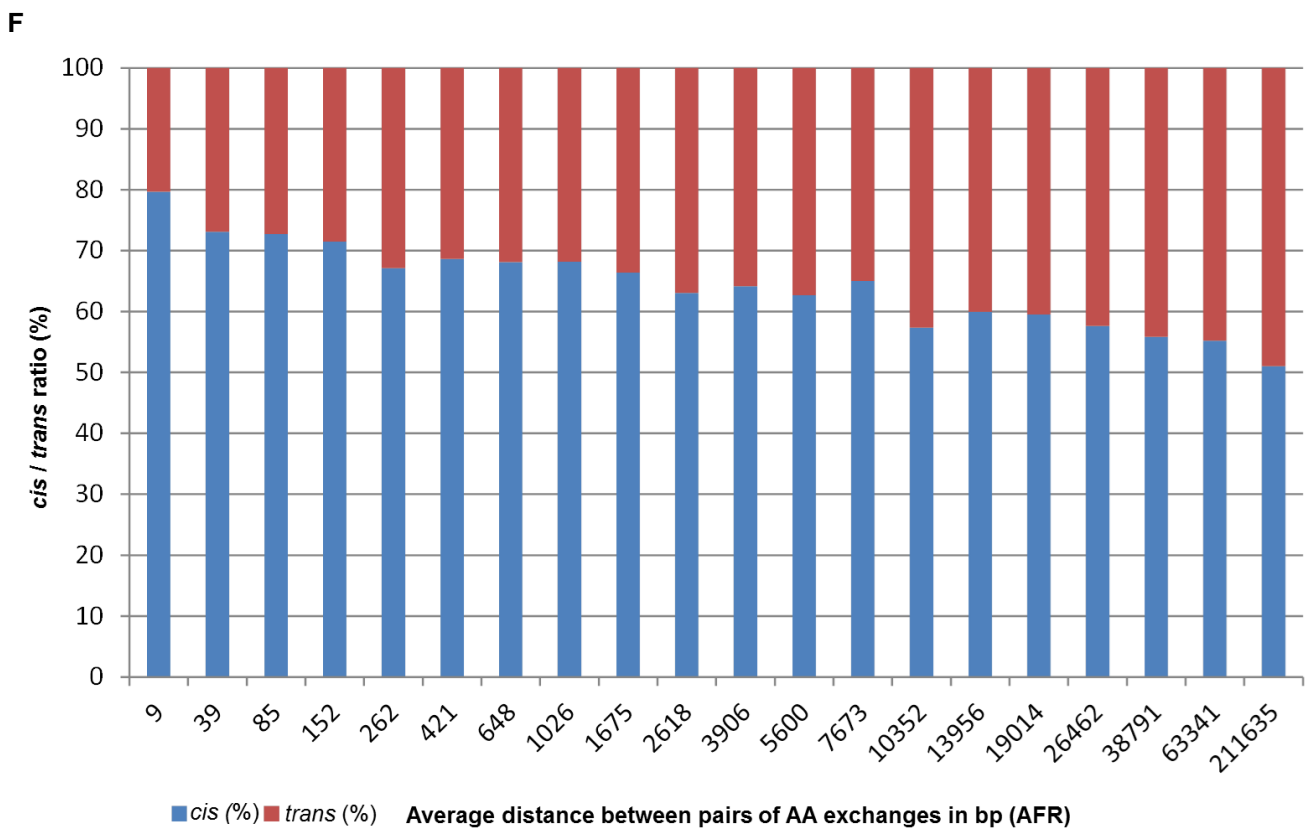

**Figure S1. Relationship of inter-mutation distance with *cis/trans* ratio**

(E) Relationship of inter-mutation distance with *cis/trans* ratio for pairs of amino acid (AA) exchanges in EUR, analogous to (A).

(F) Relationship of inter-mutation distance with *cis/trans* ratio for pairs of AA exchanges in AFR, analogous to (A).

**G**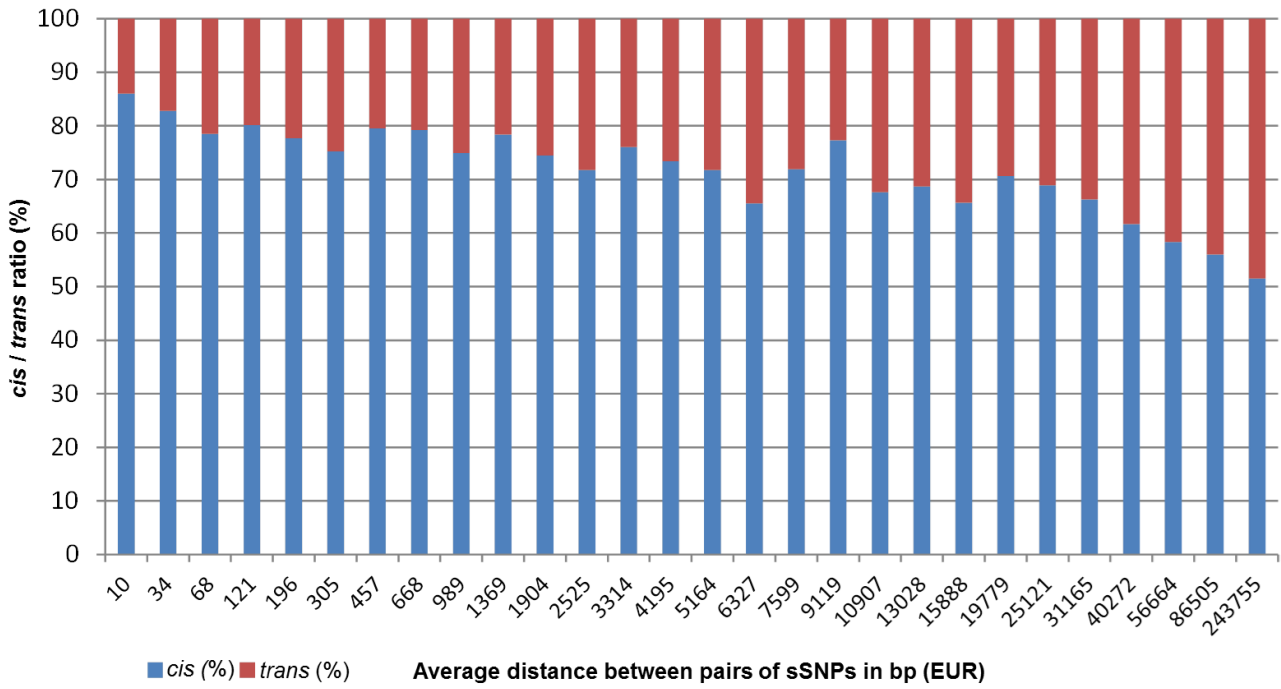**H**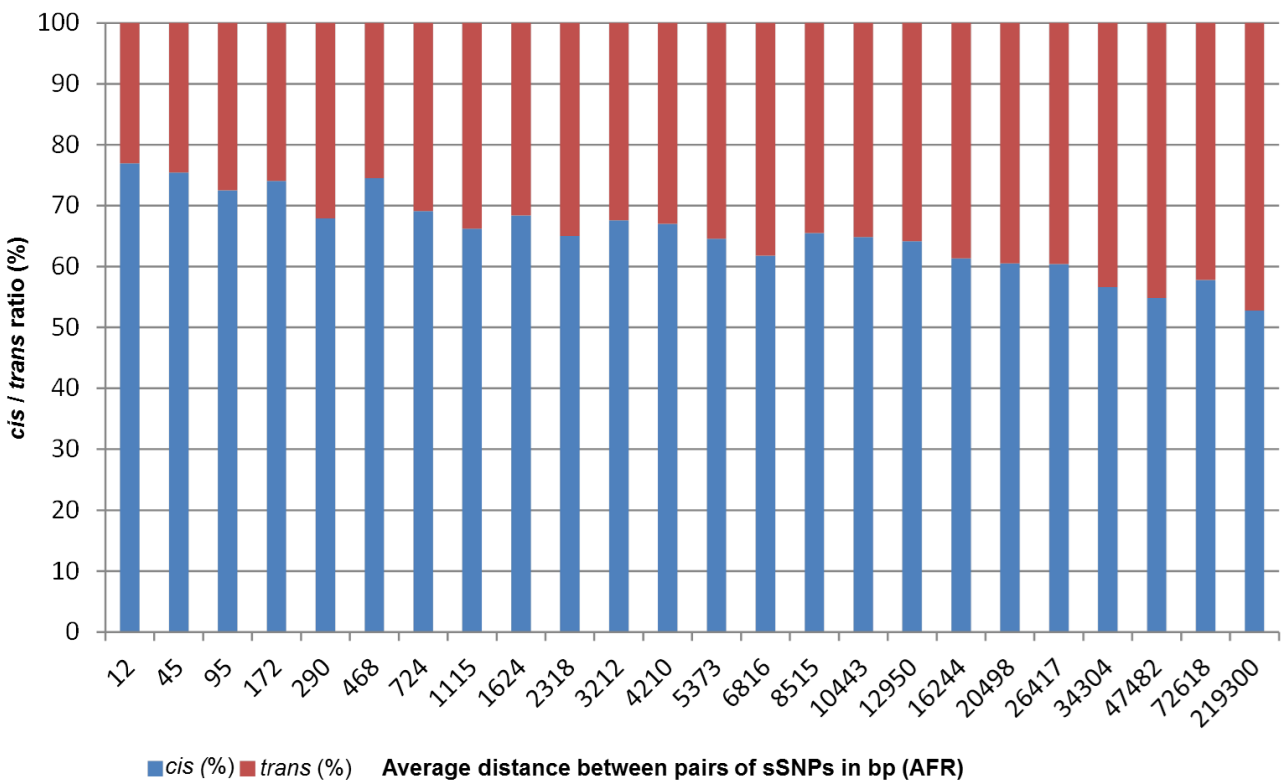**Figure S1. Relationship of inter-mutation distance with *cis/trans* ratio**

(G) Relationship of inter-mutation distance with *cis/trans* ratio for pairs of synonymous SNPs (sSNPs) in EUR, analogous to (A).

(H) Relationship of inter-mutation distance with *cis/trans* ratio for pairs of sSNPs in AFR, analogous to (A).

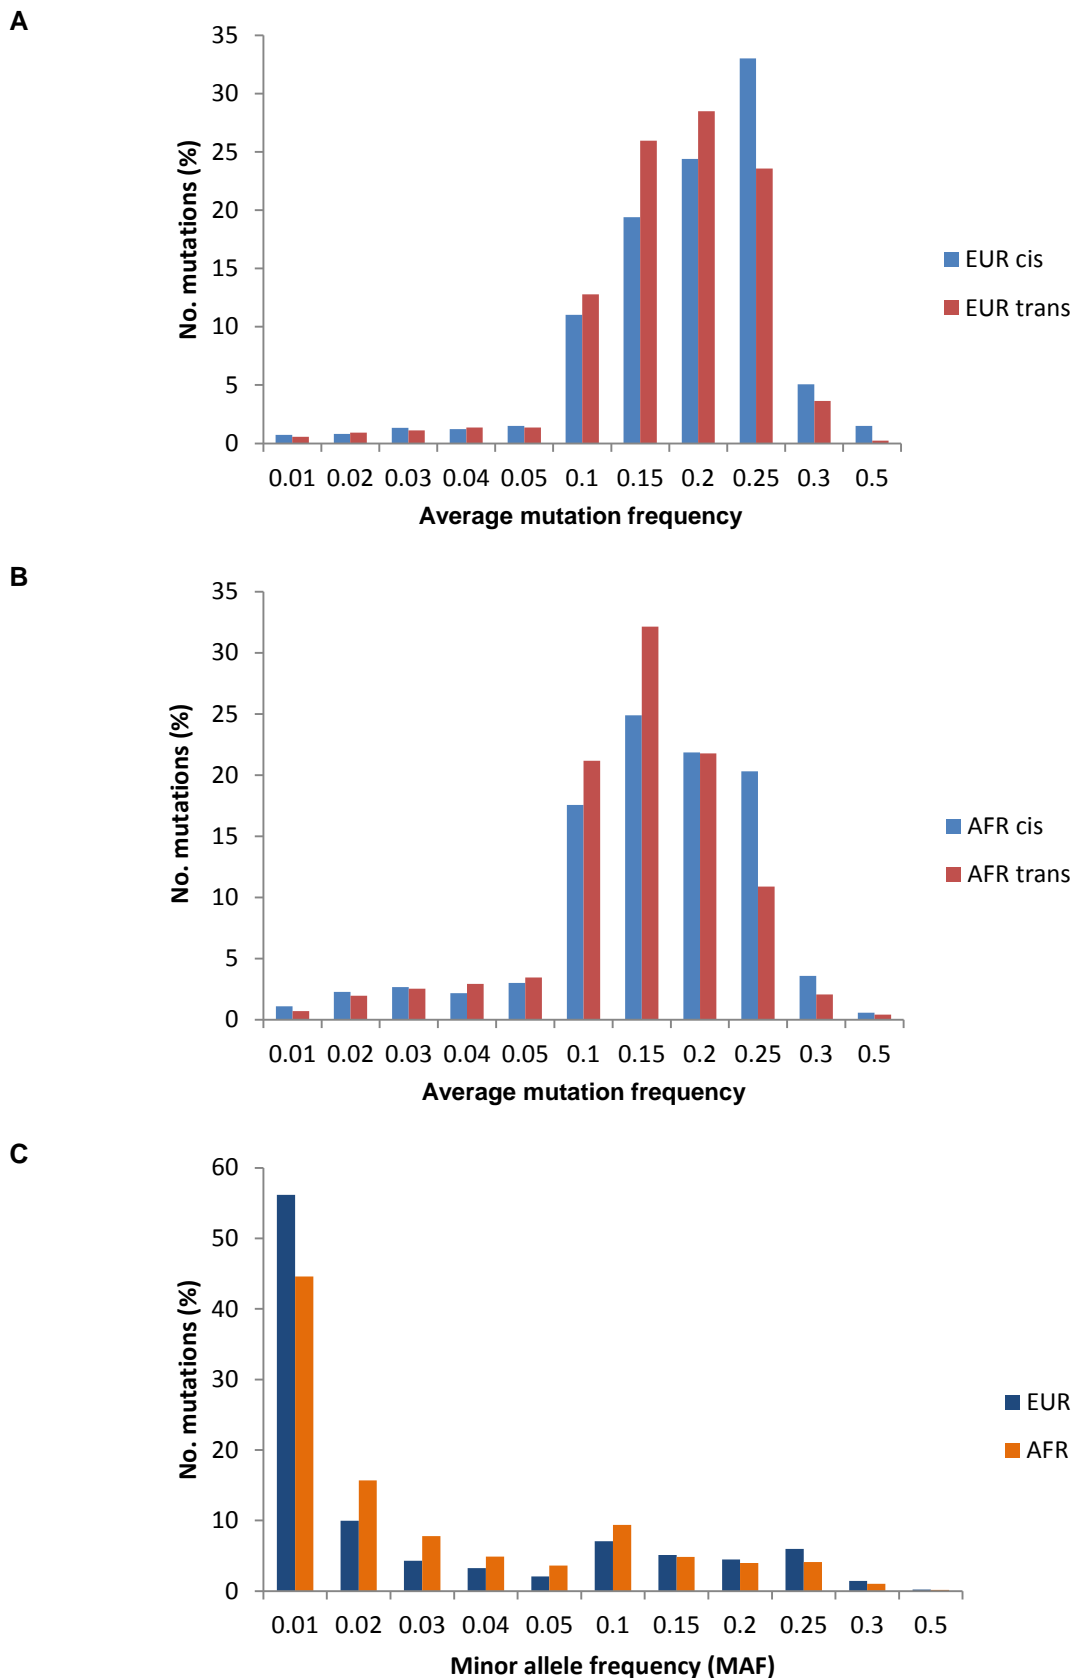

**Figure S2. Average mutation frequency spectrum of pairs of mutations in *cis* and *trans***

(A) Average mutation frequency spectrum of pairs of protein-altering mutations in *cis* or *trans* in EUR (1000G); x-axis: average mutation frequency per bin (for each different pair of mutations in *cis* or *trans*, an average frequency is derived from the minor allele frequencies (MAFs) of each of the two mutations provided by the 1000G database (Abecasis et al. 2012) for each ancestry group). Y-axis: fraction of mutation pairs in *cis* or *trans* (%) relative to the total number of different pairs of protein-altering mutations in *cis* or *trans* (100%); blue bars indicate pairs of mutations in *cis*, red bars pairs in *trans*. For instance, 33% of all different mutation pairs in *cis* have an average mutation frequency > 0.2 and ≤ 0.25. For instance, 28% of all different mutation pairs in *trans* have an average mutation frequency > 0.15 and ≤ 0.2. (B) Analogous to (A), average mutation frequency spectrum of pairs of protein-altering mutations in *cis* or *trans* in AFR. (C) Minor allele frequency (MAF) spectrum of all protein-altering mutations in EUR and AFR. All protein-altering mutations contained in the entirety of autosomal protein-coding genes (RefSeq) in the 1000G database, for each of the ancestry groups. X-axis: MAF per bin, presented separately for EUR (orange-brown) and AFR (blue); y-axis: the fraction of mutations (%) relative to the total number of mutations (100%), which are contained in each of the specified MAF bins.

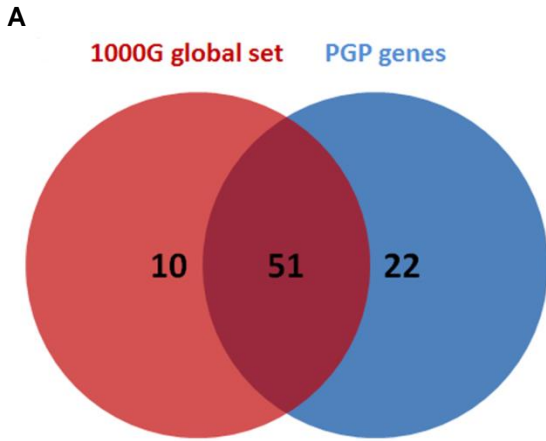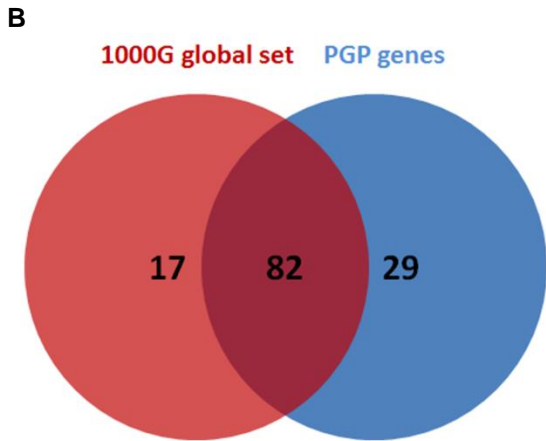

**Figure S3. Pathways and GO terms shared between 1000G global set and PGP**

(A) VENN diagram showing the overlap of pathways, which were significantly enriched ( $P < 0.01$ ) in the global set of 2,402 phase-sensitive genes (1000G) (red circle) and the set of 1,627 phase-sensitive genes ( $P < 0.01$ ), which PGP shared with 1000G (blue circle). (B) VENN diagram showing the overlap of GO terms, which were significantly enriched ( $P < 0.001$ ) in the global set of 2,402 phase-sensitive genes (1000G) (red circle) and the set of 1,627 phase-sensitive genes ( $P < 0.001$ ), which PGP shared with 1000G (blue circle).

The overlap of the sets can be quantified with Sorensen's similarity index,  $S = \frac{2ab}{a+b}$ , where  $a$  is the number of genes in the first set,  $b$  the number of genes in the second set and  $ab$  the number of genes shared by the two sets. This results in  $S = 0.76$  for the similarity between pathways (~76%) and  $S = 0.78$  for the similarity between GO terms (~78%).

**A**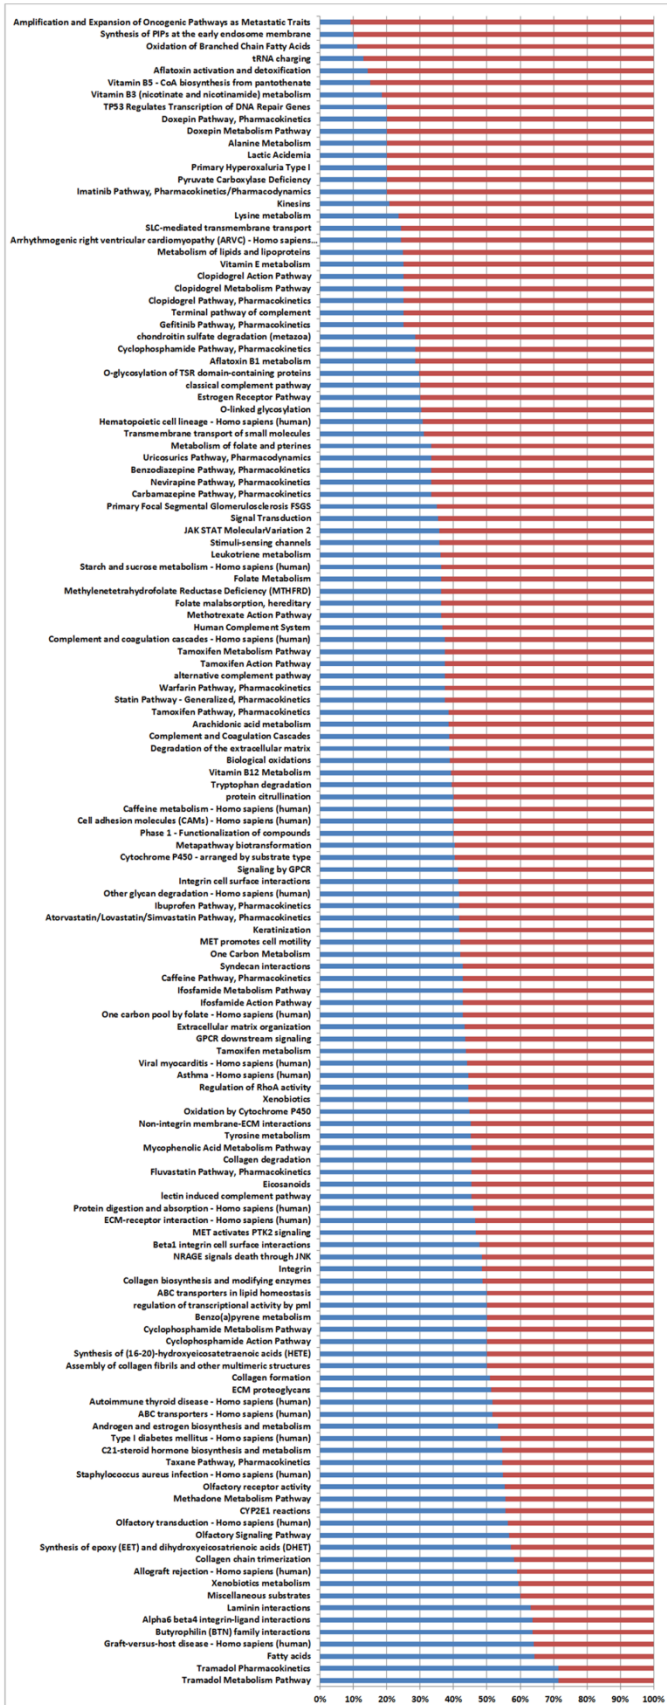**B**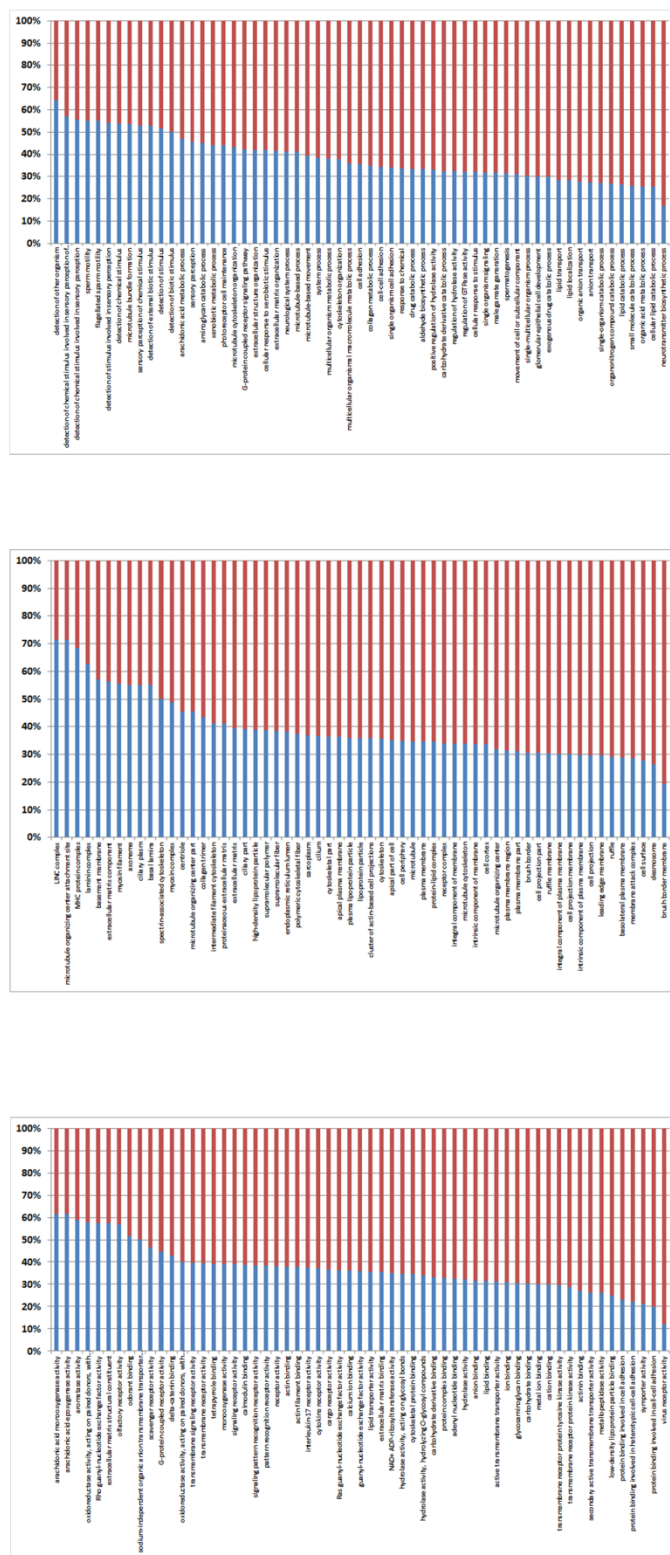

**Figure S4. Enrichment of global sets of phase-sensitive and variable genes with pathways and GO terms**

(A) Enrichment of the global set of 7,524 variable genes (which have  $\geq 1$  protein-altering mutations in at least one genome in each of the four ancestry groups in 1000G) with pathways. The 138 most significantly enriched pathways ( $P < 0.01$ ) are shown. Blue bars: relative proportion (%) of the subset of genes with  $\geq 2$  protein-altering mutations, i.e. the genes from the global set of phase-sensitive genes (1000G); red bars: relative proportion (%) of the genes with one mutation.

(B) Enrichment of the global set of 7,524 variable genes (1000G) with GO terms. The 177 most significantly enriched GO terms ( $P < 0.001$ ) are shown. Blue bars: relative proportion/contribution (%) of the subset of genes with  $\geq 2$  protein-altering mutations, i.e. the genes from the global set of phase-sensitive genes (1000G); red bars: relative proportion/contribution (%) of the genes with one mutation. Top: GO terms related to 'biological process'; middle: GO terms related to 'cellular component'; bottom: GO terms related to 'molecular function'.

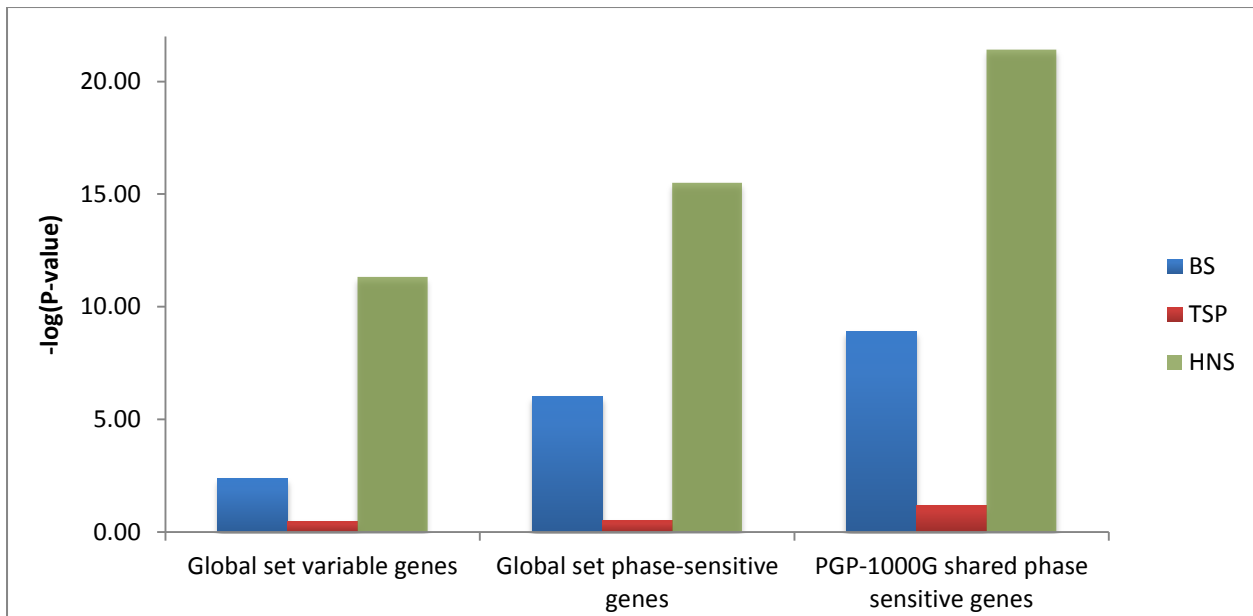

**Figure S5. Enrichment of 1000G and PGP variable genes for gene sets of evolutionary significance**

Panel, left: Blue bar indicates significance of enrichment of the global set of variable genes (1000G), i.e. genes with  $\geq 1$  mutations, with a set of 226 genes reported to evolve under balancing selection (BS); red bar significance of enrichment with a set of 60 genes with any evidence of human-chimpanzee trans-species polymorphisms or haplotypes (TSPs), and green bar enrichment with a set of 104 genes harboring at least one ancient protein-coding SNP or haplotype shared between humans and Neanderthals (HNS); y-axis: negative log of the enrichment  $P$ -value computed with Fisher's exact test. Panel, center: significance of enrichment of the global set of phase-sensitive genes (1000G), i.e. genes with  $\geq 2$  mutations, with these gene sets. Panel, right: significance of enrichment of the set of 1,627 (cross-validated) phase-sensitive genes which PGP shares with the global set of phase-sensitive genes (1000G). The gene sets of potential evolutionary significance are described in Savova et al. (2016).



**A**

Signaling by GPCR  
Signal Transduction  
Androgen and estrogen biosynthesis and metabolism  
Xenobiotics metabolism  
Fatty acids  
Butyrophilin (BTN) family interactions  
Miscellaneous substrates  
Taxane Pathway, Pharmacokinetics  
Oxidation by Cytochrome P450  
C21-steroid hormone biosynthesis and metabolism  
Arachidonic acid metabolism  
Tyrosine metabolism  
Linoleate metabolism  
Other glycan degradation - Homo sapiens (human)  
Fanconi anemia pathway - Homo sapiens (human)  
Biological oxidations  
Cytochrome P450 - arranged by substrate type  
Leukotriene metabolism  
Metapathway biotransformation  
Tamoxifen metabolism  
Apoptotic cleavage of cellular proteins  
Phase 1 - Functionalization of compounds

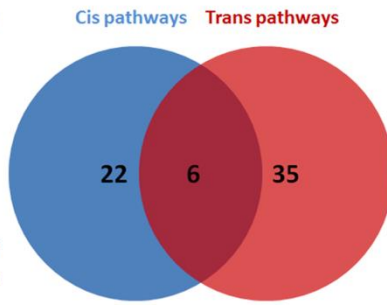

Olfactory transduction - Homo sapiens (human)  
Olfactory Signaling Pathway  
Olfactory receptor activity  
GPCR downstream signaling  
Keratinization  
Extracellular matrix organization

Graft-versus-host disease - Homo sapiens (human)  
Autoimmune thyroid disease - Homo sapiens (human)  
Allograft rejection - Homo sapiens (human)  
Beta1 integrin cell surface interactions  
ECM-receptor interaction - Homo sapiens (human)  
Type I diabetes mellitus - Homo sapiens (human)  
Antigen processing and presentation - Homo sapiens (human)  
Allograft Rejection  
Collagen chain trimerization  
Viral myocarditis - Homo sapiens (human)  
Endosomal/Vacuolar pathway  
Toxoplasmosis - Homo sapiens (human)  
Staphylococcus aureus infection - Homo sapiens (human)  
Collagen formation  
ECM proteoglycans  
Laminin interactions  
Syndecan-1-mediated signaling events  
Focal Adhesion  
Asthma - Homo sapiens (human)  
Herpes simplex infection - Homo sapiens (human)  
Integrin  
Cell adhesion molecules (CAMs) - Homo sapiens (human)  
Collagen biosynthesis and modifying enzymes  
Histidine degradation  
Non-integrin membrane-ECM interactions  
Antigen Presentation: Folding, assembly and peptide loading of class I MHC  
Histidine metabolism - Homo sapiens (human)  
Intestinal immune network for IgA production - Homo sapiens (human)  
Epstein-Barr virus infection - Homo sapiens (human)  
Protein digestion and absorption - Homo sapiens (human)  
Antigen processing-Cross presentation  
Focal Adhesion-P13K-Akt-mTOR-signaling pathway  
Amine compound SLC transporters  
ABC transporters - Homo sapiens (human)  
NRAGE signals death through JNK

**B**

G-protein coupled receptor activity  
neurological system process  
G-protein coupled receptor signaling pathway  
system process  
odorant binding  
sperm motility  
flagellated sperm motility  
response to chemical  
cytoskeletal part  
microtubule cytoskeleton organization  
cilium movement  
intermediate filament cytoskeleton  
intermediate filament  
aromatase activity  
regulation of microtubule-based movement  
microtubule bundle formation  
oxidoreductase activity, acting on paired donors, with incorporation or reduction of molecular oxygen, reduced flavin or flavoprotein as one donor, and incorporation of one atom of oxygen  
3M complex  
polymeric cytoskeletal fiber  
sodium-independent organic anion transmembrane transporter activity

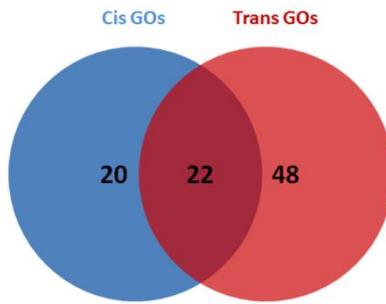

olfactory receptor activity  
detection of chemical stimulus involved in sensory perception  
perception  
detection of stimulus involved in sensory perception  
detection of chemical stimulus  
sensory perception of chemical stimulus  
detection of stimulus  
sensory perception  
transmembrane signaling receptor activity  
transmembrane receptor activity  
signaling receptor activity  
receptor activity  
cell periphery  
plasma membrane  
integral component of membrane  
intrinsic component of membrane  
Rho guanyl-nucleotide exchange factor activity  
basement membrane  
supramolecular fiber  
supramolecular polymer  
cytoskeleton  
extracellular matrix component

proteinaceous extracellular matrix  
extracellular matrix  
MHC protein complex  
luminal side of endoplasmic reticulum membrane  
integral component of luminal side of endoplasmic reticulum membrane  
extracellular matrix structural constituent  
peptide antigen binding  
plasma membrane part  
basal lamina  
cell adhesion  
detection of other organism  
interferon-gamma-mediated signaling pathway  
apical plasma membrane  
MHC class I protein complex  
detection of biotic stimulus  
cytoskeleton organization  
extracellular matrix organization  
extracellular structure organization  
ER to Golgi transport vesicle membrane  
fibrillar collagen trimer  
banded collagen fibril  
LINC complex  
microtubule organizing center attachment site  
plasma membrane region  
axonemal dynein complex  
cytoskeletal anchoring at nuclear membrane  
detection of external biotic stimulus  
multicellular organism metabolic process  
axoneme part  
apical part of cell  
MHC class II protein complex  
ciliary part  
cell-cell adhesion  
homophilic cell adhesion via plasma membrane adhesion molecules  
calcium ion binding  
axoneme  
ciliary plasm  
response to interferon-gamma  
notochord development  
cilium  
multicellular organismal catabolic process  
regulation of synaptic growth at neuromuscular junction  
outer dynein arm  
MHC class II receptor activity  
complex of collagen trimers  
collagen trimer  
endocytic vesicle membrane  
integral component of plasma membrane

**Figure S6. Differential enrichment of *cis*- and *trans*-abundant genes with pathways and GO terms**  
(A) VENN diagram showing the intersection of the pathways which are enriched in either *cis*- (left) or *trans*-abundant genes (right); pathways listed in-between are enriched in both gene categories. (B) Intersection of the GO terms enriched in either *cis*- (left) or *trans*-abundant genes (right); GO terms listed in-between are enriched in both gene categories.

A

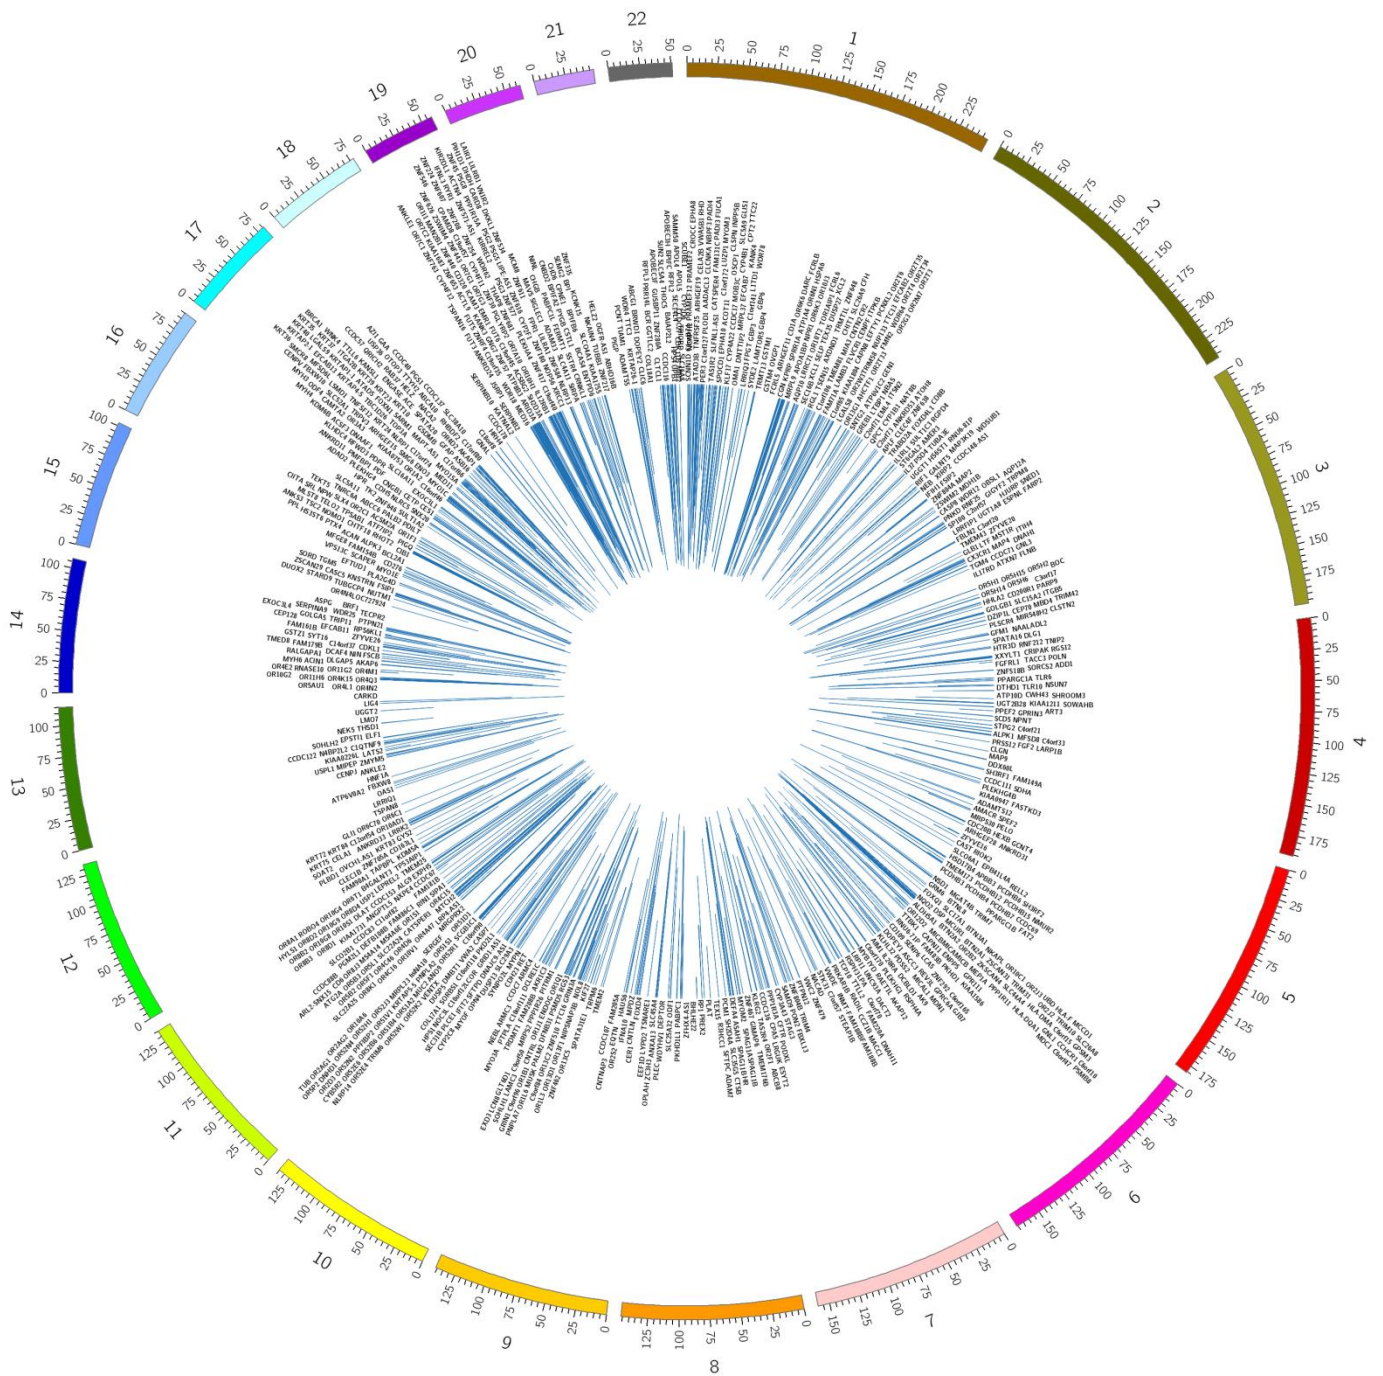

Figure S7. Distribution of *cis*- and *trans*-abundant genes across the autosomes (A) Distribution of *cis*-abundant genes.

B

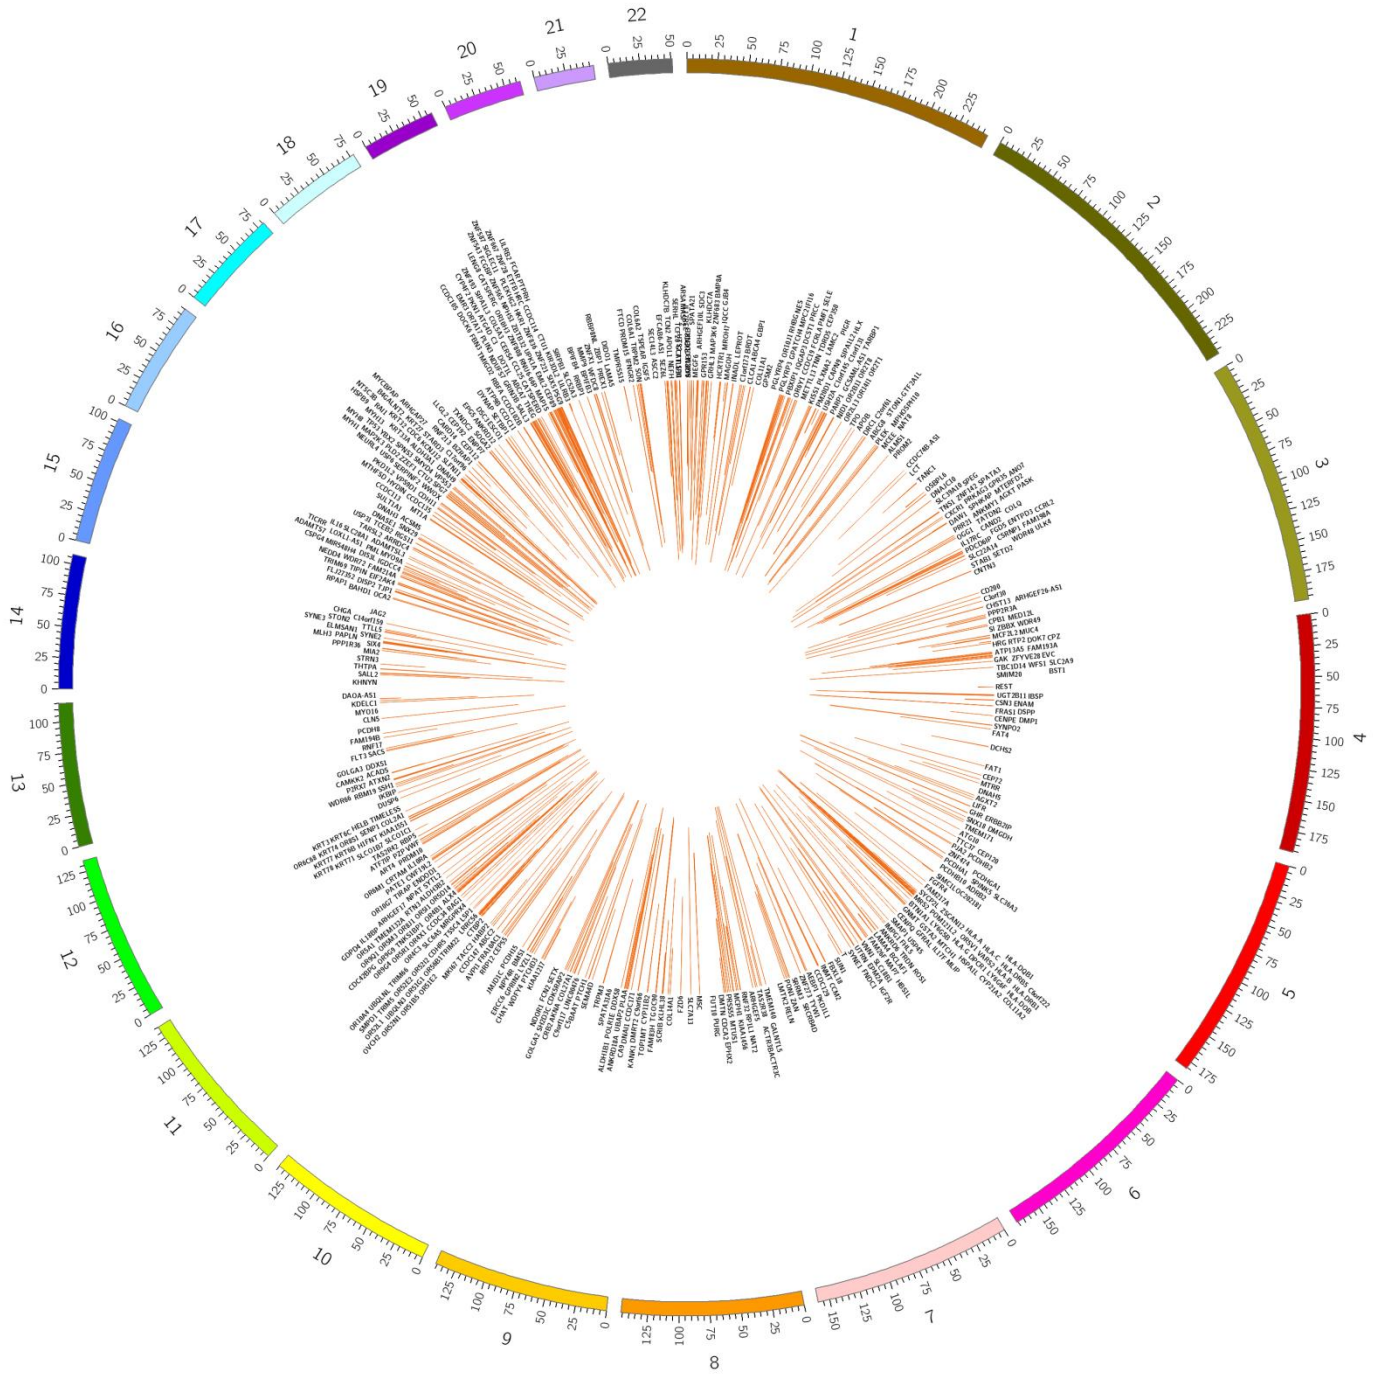

Figure S7. Distribution of *cis*- and *trans*-abundant genes across the autosomes  
(B) Distribution of *trans*-abundant genes.
